# Supplementary material for: Impact of size control of graphene oxide nanosheets for enhancing electrical and mechanical properties of carbon nanotube–polymer composites
Source: Royal Society of Chemistry journal article supplement (doi:10.1039/c7ra04015f), 2017-01-01
Supplement: c7ra04015f1.pdf [file c7ra04015f1.pdf]

## Supporting Information

# **Impact of Size Control of Graphene Oxide Nanosheet for Enhancing Electrical and Mechanical Properties of Carbon Nanotube-Polymer Composites**

Jeonghwan Kim, Sang Woo Kim, Hongseok Yun\*, and Bumjoon J. Kim\*

*\*Department of Chemical and Biomolecular Engineering, Korea Advanced Institute of Science and Technology (KAIST), Daejeon 34141, Republic of Korea*

Keywords: size-controlled graphene oxides, multi-walled carbon nanotubes (CNTs), dispersants, CNT-polymer nanocomposites

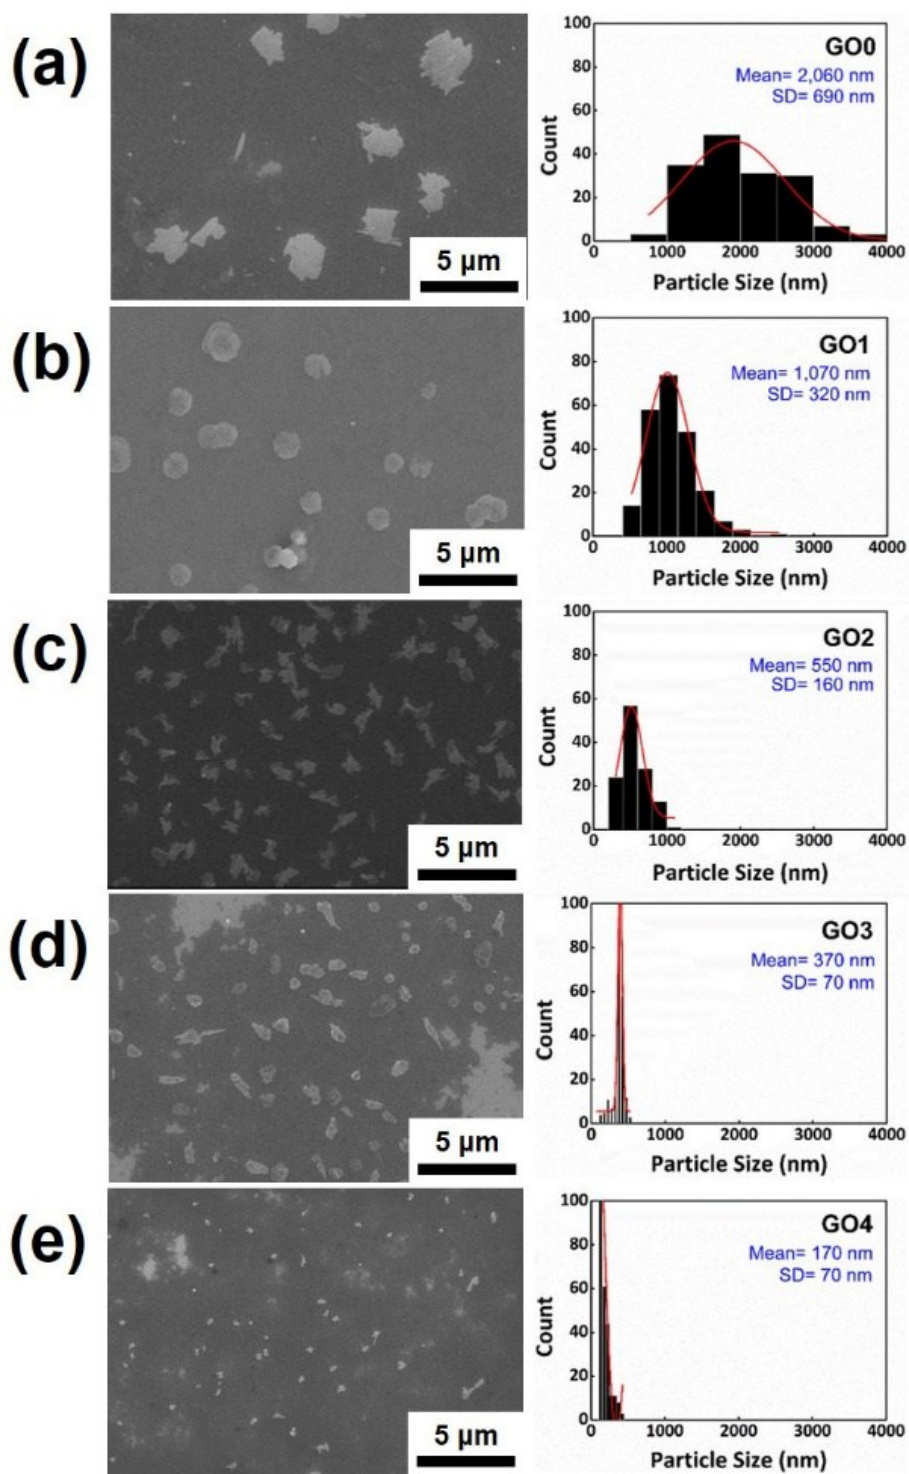

**Fig. S1.** SEM images and size histograms of GO nanosheets sonicated for (a) 0 min, (b) 10 min, (c) 30 min, (d) 60 min, and (e) 120 min, respectively.

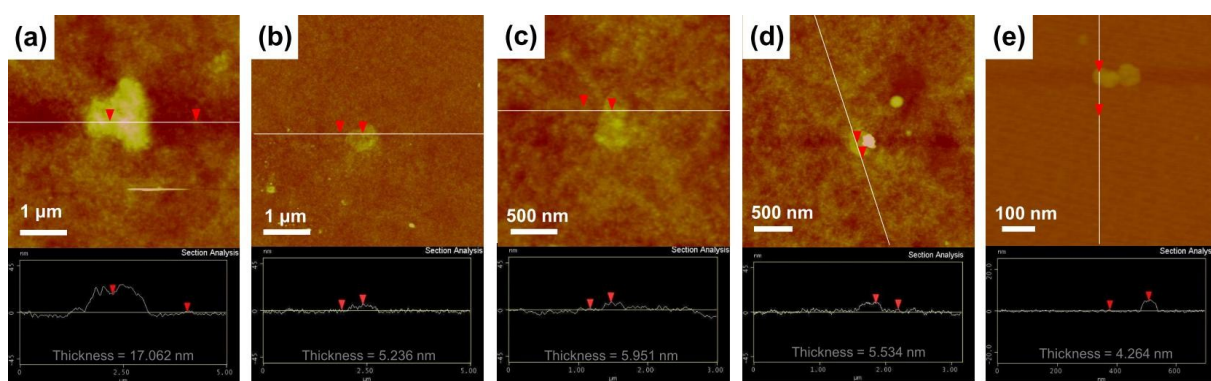

**Fig. S2.** AFM images and thickness profiles of (a) GO0, (b) GO1, (c) GO2, (d) GO3, and (e) GO4.

**Table S1.** Calculated C/O ratio of graphite and GOs with different lateral size

|                  | Graphite | GO0  | GO1  | GO2  | GO3  | GO4  |
|------------------|----------|------|------|------|------|------|
| <b>C/O Ratio</b> | 16.5     | 1.74 | 1.55 | 1.59 | 1.62 | 1.56 |

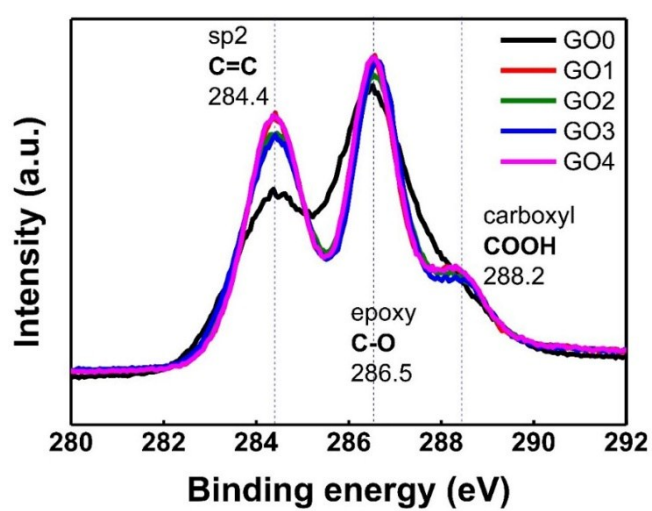

**Fig. S3.** XPS C1s spectra of GOs sonicated for 0, 10, 30, 60, and 120 min.

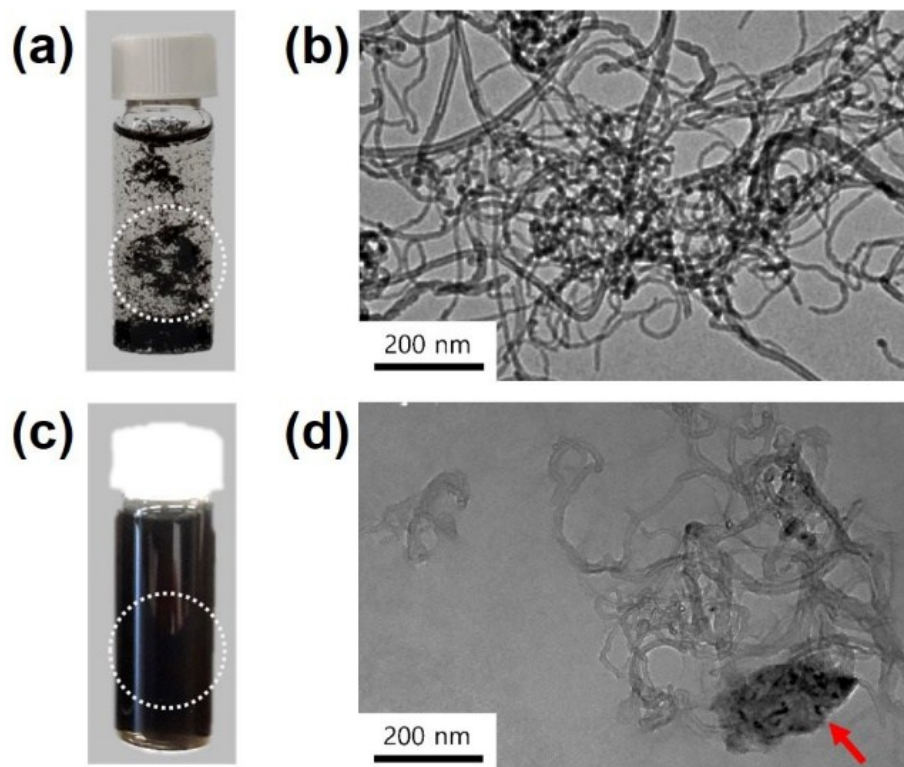

**Fig. S4.** Photographic and TEM images of MWCNT dispersed in DI water: (a–b) pristine MWCNTs, and (c–d) GO4-assisted MWCNT dispersion. (The red arrow indicates GO sheet.)

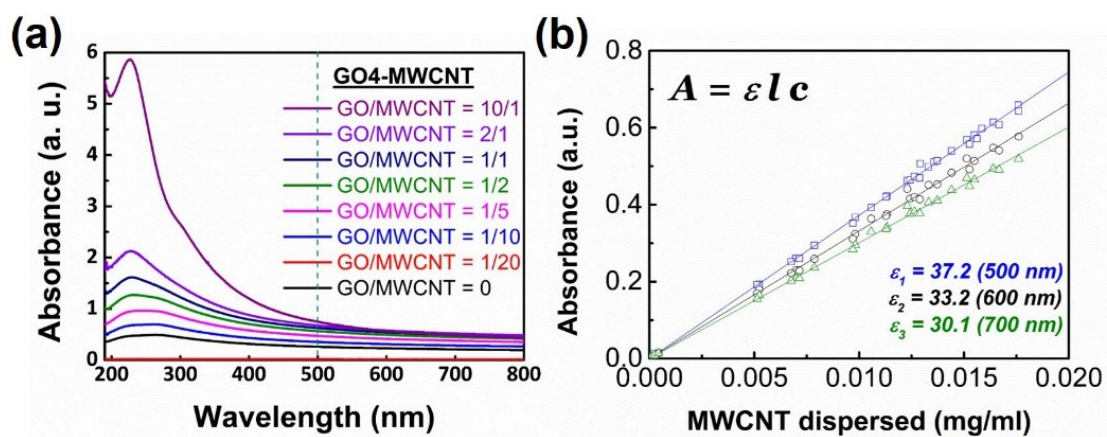

**Fig. S5.** (a) UV-vis absorption spectra of GO4-MWCNTs. (b) UV absorbance of MWCNTs at different wavelengths as a function of concentration of MWCNTs dispersed in water (from the Beer-Lambert Law)

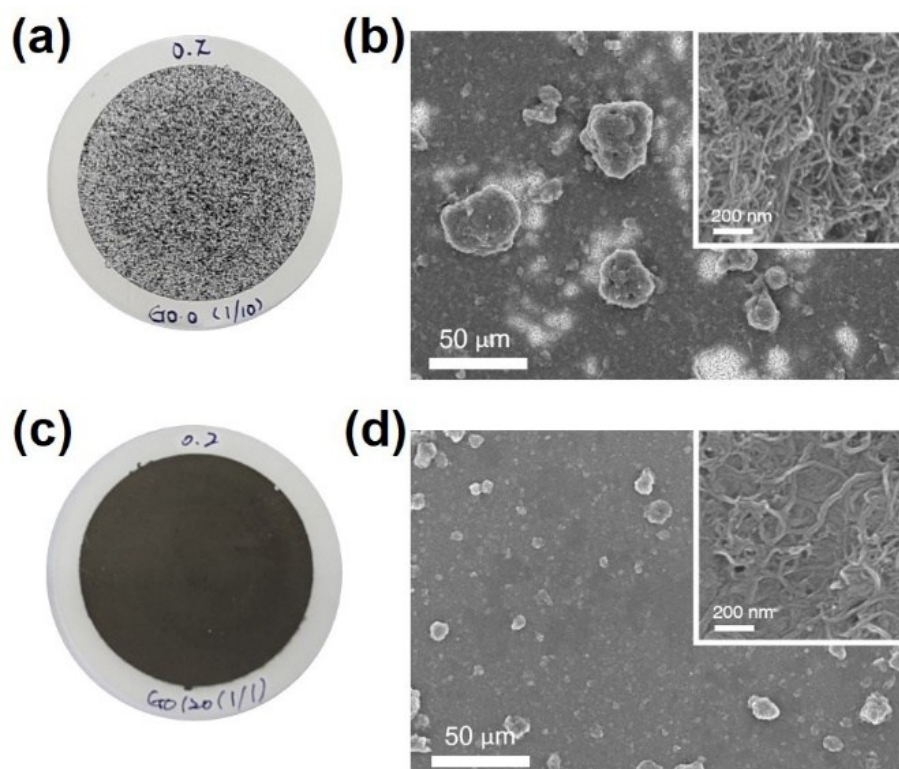

**Fig. S6.** MWCNT films deposited on polymer membranes. Digital pictures and SEM images (inset shows higher magnification) of (a–b) GO0-MWCNT film, and (c–d) GO4-MWCNT film



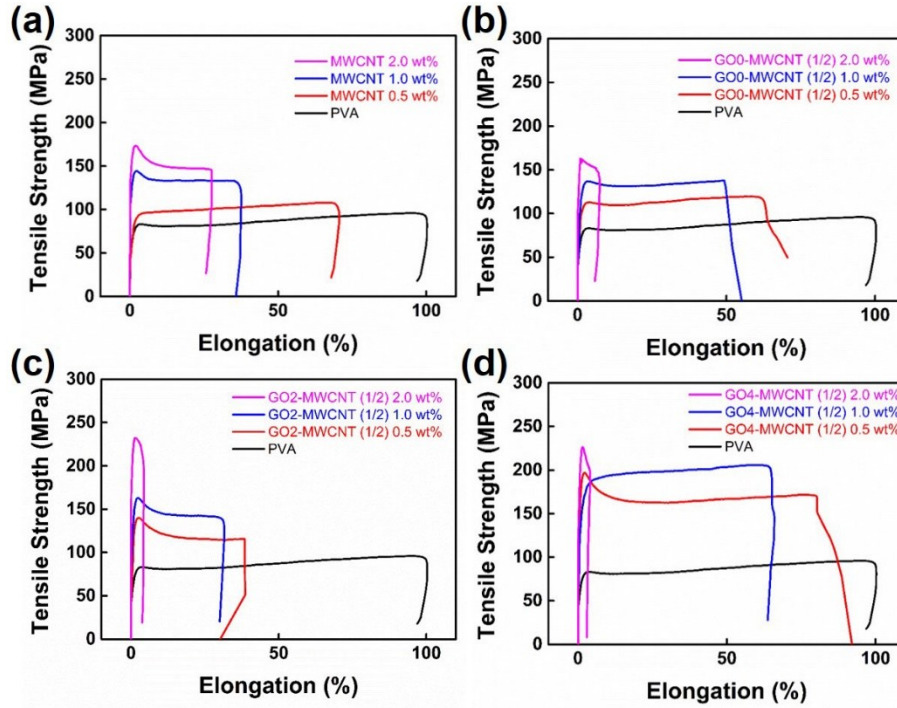

**Fig. S7.** Stress-strain behavior of GO-MWCNT composites containing different MWCNT volume fraction: (a) pristine MWCNT, (b) GO0-MWCNT, (c) GO2-MWCNT, and (d) GO4-MWCNT filled in the PVA composites, respectively. In all GO-MWCNT samples,  $W_{GO}/W_{MWCNT}$  were kept constant at 0.5.

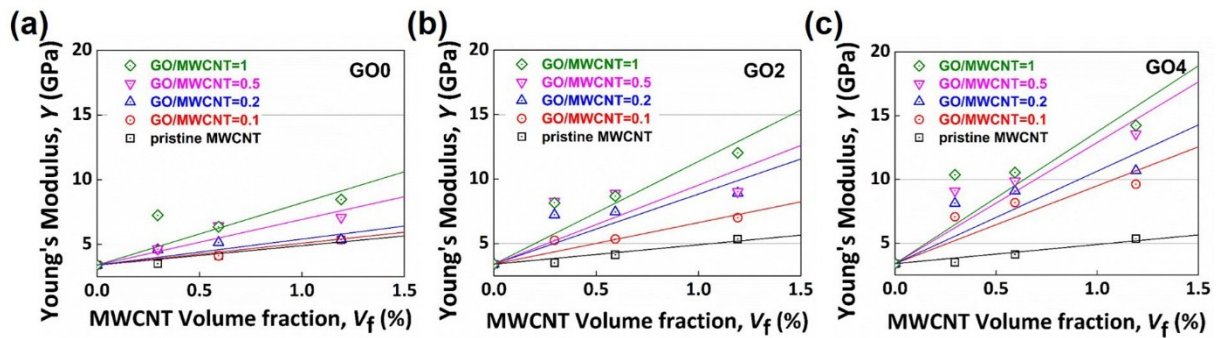

**Fig. S8.** Young's moduli of GO-MWCNT composites containing different GOs as a function of the MWCNT volume fraction: (a) GO0, (b) GO2, and (c) GO4.
